# Supplementary material for: Uitkomsten in de dagelijkse praktijk van eerstelijnschemotherapie voor niet-resectabel stadium III en IV urotheelcarcinoom van de blaas
Source: Springer Nature journal article supplement (doi:10.1007/s13629-024-00425-5), 2024-03-08
Supplement: MOESM1 [file 26837964]

Supplement tabel 1. Basiskenmerken en oncologische uitkomsten van patiënten die salvage chemotherapie (sCTx) ondergingen, voor stadium ≥ cT2N0M0 urotheelcarcinoom van de blaas met recidief ziekte na radicale cystectomie

|  |  |  |  |  |  |  |  |  |
| --- | --- | --- | --- | --- | --- | --- | --- | --- |
|  |  | alle typen chemotherapie | | gemcitabine + cisplatine | | gemcitabine + carboplatine | |  |
|  | | *(n = 88)* | | *(n = 31)* | | *(n = 51)* | | *p-waarde** |
| vrouwelijke sekse, aantal (%) | | 12 | (13,6) | 5 | (16,1) | 5 | (9,8) | 0,396 |
| leeftijd bij diagnose, gemiddelde (sd) | | 65,2 | (±7,4) | 63,1 | (±6,2) | 67,1 | (±7,8) | *0,015* |
| leeftijd bij diagnose, jaren, aantal (%) | |  |  |  |  |  |  | 0,066 |
|  | < 65 | 42 | (47,7) | 20 | (64,5) | 17 | (33,3) |  |
|  | 65-69 | 21 | (23,9) | 6 | (19,4) | 14 | (27,5) |  |
|  | 70-74 | 15 | (17,0) | 4 | (12,9) | 11 | (21,6) |  |
|  | 75-79 | 9 | (10,2) | 1 | (3,2) | 8 | (15,7) |  |
|  | 80-84 | 1 | (1,1) | 0 | (0,0) | 1 | (2,0) |  |
|  | 85+ | 0 | (0,0) | 0 | (0,0) | 0 | (0,0) |  |
| creatinineklaring (CrKl), mL/min, aantal (%) | |  |  |  |  |  |  | *< 0,001* |
|  | 60-99 | 54 | (67,5) | 27 | (96,4) | 26 | (51,0) |  |
|  | 50-59 | 26 | (32,5) | 1 | (3,6) | 23 | (45,1) |  |
|  | 30-49 | 0 | (0,0) | 0 | (0,0) | 0 | (0,0) |  |
|  | Onbekend | 8 | - | 3 | - | 2 | (3,9) |  |
| ECOG PS, aantal (%) | |  |  |  |  |  |  | *< 0,001* |
|  | 0-1 | 46 | (66,7) | 30 | (96,8) | 14 | (38,9) |  |
|  | 2 | 22 | (31,9) | 0 | (0,0) | 22 | (61,1) |  |
|  | 3 | 1 | (1,4) | 1 | (3,2) | 0 | (0,0) |  |
|  | onbekend | 19 | - | 0 | - | 15 | - |  |
| hoeveelheid chemotherapiecycli, mediaan (IQR) | | 5,0 | (3,0-6,0) | 5,0 | (2,75-6,0) | 5,0 | (3,0-6,0) | 0,646 |
| Behandeld met ≥ 4 cycli, aantal (%) | | 50 | (64,1) | 21 | (70,0) | 32 | (66,7) |  |
| dosisreductie, aantal (%) | | 25 | (30,5) | 8 | (27,6) | 16 | (32,0) | 0,802 |
| switch van cisplatine naar carboplatine, aantal (%) | | - | - | 3 | (10,7) | - | - | - |
| vroegtijdige beëindiging, aantal (%) | | 42 | (53,2) | 17 | (58,6) | 24 | (51,1) | 0,637 |
| klinische beste respons, aantal (%) | |  |  |  |  |  |  | 0,604 |
|  | complete respons (kCR) | 7 | (8,9) | 2 | (7,1) | 5 | (10,6) |  |
|  | partiële respons (kPR) | 29 | (36,7) | 10 | (35,7) | 18 | (38,3) |  |
|  | stabiele ziekte (kSZ) | 10 | (12,7) | 2 | (7,1) | 8 | (17,0) |  |
|  | progressieve ziekte (kPZ) | 33 | (41,8) | 14 | (50,0) | 16 | (34,0) |  |
|  | onbekend | 9 | - | 3 | - | 4 | - |  |
| CTCAE-complicaties, aantal (%) | |  |  |  |  |  |  | 0,329 |
|  | graad 3 | 39 | (54,9) | 13 | (56,5) | 24 | (52,2) |  |
|  | graad 4 | 8 | (11,3) | 3 | (13,0) | 5 | (10,9) |  |
|  | graad 5 | 1 | (1,4) | 1 | (4,3) | 0 | (0,0) |  |
| OS vanaf start chemotherapie, mediaan maanden (95%-BI) | | 9,7 | (7,3-12,1) | 8,3 | (2,2-14,4) | 9,7 | (7,2-12,3) | 0,294 |
| OS vanaf diagnose recidief, mediaan maanden (95%-BI) | | 12,8 | (8,2-17,3) | 12,8 | (4,7-20,9) | 12,4 | (7,3-17,5) | 0,328 |
| OS vanaf radicale cystectomie, mediaan maanden (95%-BI) | | 23,0 | (18,1-27,8) | 23,3 | (7,4-39,2) | 23,0 | (17,7-28,2) | 0,591 |
| opeenvolgende systemische therapie, aantal (%) | | 24 | (28,2) | 7 | (23,3) | 16 | (32,7) | 0,255 |
|  | | | | | | | | |
| * *De p*-waarde is berekend over het verschil tussen gemcitabine + cisplatine en gemcitabine + carboplatine | | | | | | | | |
| *ECOG: Eastern Cooperative Oncology Group, PS: performance score, CTCAE: common terminology criteria for adverse events, OS: algehele survival, SD: standaarddeviatie, 95%-BI: 95%-betrouwbaarheidsinterval* | | | | | | | | |
