# Supplementary material for: Uitkomsten in de dagelijkse praktijk van eerstelijnschemotherapie voor niet-resectabel stadium III en IV urotheelcarcinoom van de blaas
Source: Springer Nature journal article supplement (doi:10.1007/s13629-024-00425-5), 2024-03-08
Supplement: MOESM2 [file 26837964]

*Supplement tabel 2. Basis karakteristieken en oncologische uitkomsten van patiënten welke primaire chemotherapie behandeling (pCTx) ondergingen voor niet-resectabel stadium III (cT2-4aN1-3M0) en IV (cT4b en/of cM1) urotheel carcinoom van de blaas*

|  |  | Alle typen chemotherapie | | Gemcitabine + Cisplatine | | Gemcitabine + Carboplatine | |  |
| --- | --- | --- | --- | --- | --- | --- | --- | --- |
|  | | *(n = 103)* | | *(n = 57)* | | *(n = 41)* | | *p-waarde** |
| vrouwelijke sekse, aantal (%) | | 27 | (26.2) | 18 | (31.6) | 8 | (19.5) | 0.182 |
| leeftijd bij diagnose, gemiddelde (sd) | | 65.2 | (±8.5) | 63.1 | (±8.2) | 68.6 | (±8.3) | **0.002** |
| leeftijd bij diagnose, jaren, aantal (%) | |  |  |  |  |  |  | **0.042** |
|  | < 65 | 54 | (52.4) | 34 | (59.6) | 16 | (39.0) |  |
|  | 65-69 | 17 | (16.5) | 10 | (17.5) | 6 | (14.6) |  |
|  | 70-74 | 18 | (17.5) | 10 | (17.5) | 8 | (19.5) |  |
|  | 75-79 | 9 | (8.7) | 2 | (3.5) | 7 | (17.1) |  |
|  | 80-84 | 5 | (4.9) | 1 | (1.8) | 4 | (9.8) |  |
|  | 85+ | 0 | (0.0) | 0 | (0.0) | 0 | (0.0) |  |
| klinisch TNM-stadium, aantal (%) | |  |  |  |  |  |  | 1.000 |
|  | cT2-4aN1-3M0 | 33 | (32.0) | 17 | (29.8) | 12 | (29.3) |  |
|  | cT4b en/of cM1 | 70 | (68.0) | 40 | (70.2) | 29 | (70.7) |  |
| creatinineklaring (CrKl), mL/min, aantal (%) | |  |  |  |  |  |  | **<0.001** |
|  | 60-99 | 66 | (66.0) | 48 | (85.7) | 13 | (33.3) |  |
|  | 50-59 | 17 | (17.0) | 6 | (10.7) | 11 | (28.2) |  |
|  | 30-49 | 17 | (17.0) | 2 | (3.6) | 15 | (38.5) |  |
|  | onbekend | 3 | - | 1 | - | 2 | - |  |
| ECOG PS, aantal (%) | |  |  |  |  |  |  | **<0.001** |
|  | 0-1 | 71 | (73.2) | 51 | (96.2) | 16 | (41.0) |  |
|  | 2 | 26 | (26.8) | 2 | (3.8) | 23 | (59.0) |  |
|  | Onbekend | 6 | - | 4 | - | 2 | - |  |
| hoeveelheid chemotherapiecycli, mediaan (IQR) | | 4.0 | (3.0-6.0) | 4.5 | (3.0-6.0) | 4.0 | (2.0-6.0) | 0.235 |
| behandeld met ≥ 4 cycli, aantal (%) | | 62 | (66.0) | 35 | (70.0) | 23 | (59.0) |  |
| dosisreductie, aantal (%) | | 21 | (22.8) | 11 | (22.4) | 10 | (26.3) | 0.802 |
| switch van cisplatine naar carboplatine, aantal (%) | | - | - | 5 | (10.0) | - | - | - |
| vroegtijdige beëindiging, aantal (%) | | 50 | (53.8) | 27 | (54.0) | 22 | (57.9) | 0.829 |
| klinisch beste respons, aantal (%) | |  |  |  |  |  |  | 0.122 |
|  | complete respons (kCR) | 11 | (11.5) | 8 | (15.7) | 3 | (7.5) |  |
|  | partiële respons (kPR) | 27 | (28.1) | 15 | (29.4) | 10 | (25.0) |  |
|  | stabiele ziekte (kSZ) | 7 | (7.3) | 5 | (9.8) | 1 | (2.5) |  |
|  | progressieve ziekte (kPZ) | 51 | (53.1) | 23 | (45.1) | 26 | (65.0) |  |
|  | onbekend | 7 | - | 6 | - | 1 | - |  |
| CTCAE-complicaties, aantal (%) | |  |  |  |  |  |  | 0.684 |
|  | graad 3 | 35 | (42.2) | 22 | (47.8) | 12 | (36.4) |  |
|  | graad 4 | 14 | (16.9) | 7 | (15.2) | 7 | (16.3) |  |
|  | graad 5 | 3 | (3.6) | 1 | (2.2) | 2 | (4.7) |  |
| OS vanaf start chemotherapie, mediaan maanden (95%-BI) | | 10.2 | (8.1-12.4) | 10.5 | (8.3-12.6) | 8.4 | (5.4-11.3) | 0.292 |
| OS vanaf diagnose, mediaan maanden (95%-BI) | | 12.1 | (10.6-13.6) | 12.7 | (9.8-15.5) | 11.0 | (6.3-15.8) | 0.355 |
| Opeenvolgende systemische therapie, aantal (%) | | 14 | (14.7) | 9 | (17.3) | 3 | (7.9) | 0.341 |
|  | | | | | | | | |
| * *De p*-waarde is berekend over het verschil tussen gemcitabine + cisplatine en gemcitabine + carboplatine | | | | | | | | |
| *ECOG: Eastern Cooperative Oncology Group, PS: performance score, CTCAE: common terminology criteria for adverse events, OS: algehele survival, SD: standaarddeviatie, 95%-BI: 95%-betrouwbaarheidsinterval* | | | | | | | | |
