# Supplementary figures and images for: Uitkomsten in de dagelijkse praktijk van eerstelijnschemotherapie voor niet-resectabel stadium III en IV urotheelcarcinoom van de blaas
Source: Springer Nature journal article supplement (doi:10.1007/s13629-024-00425-5), 2024-03-08

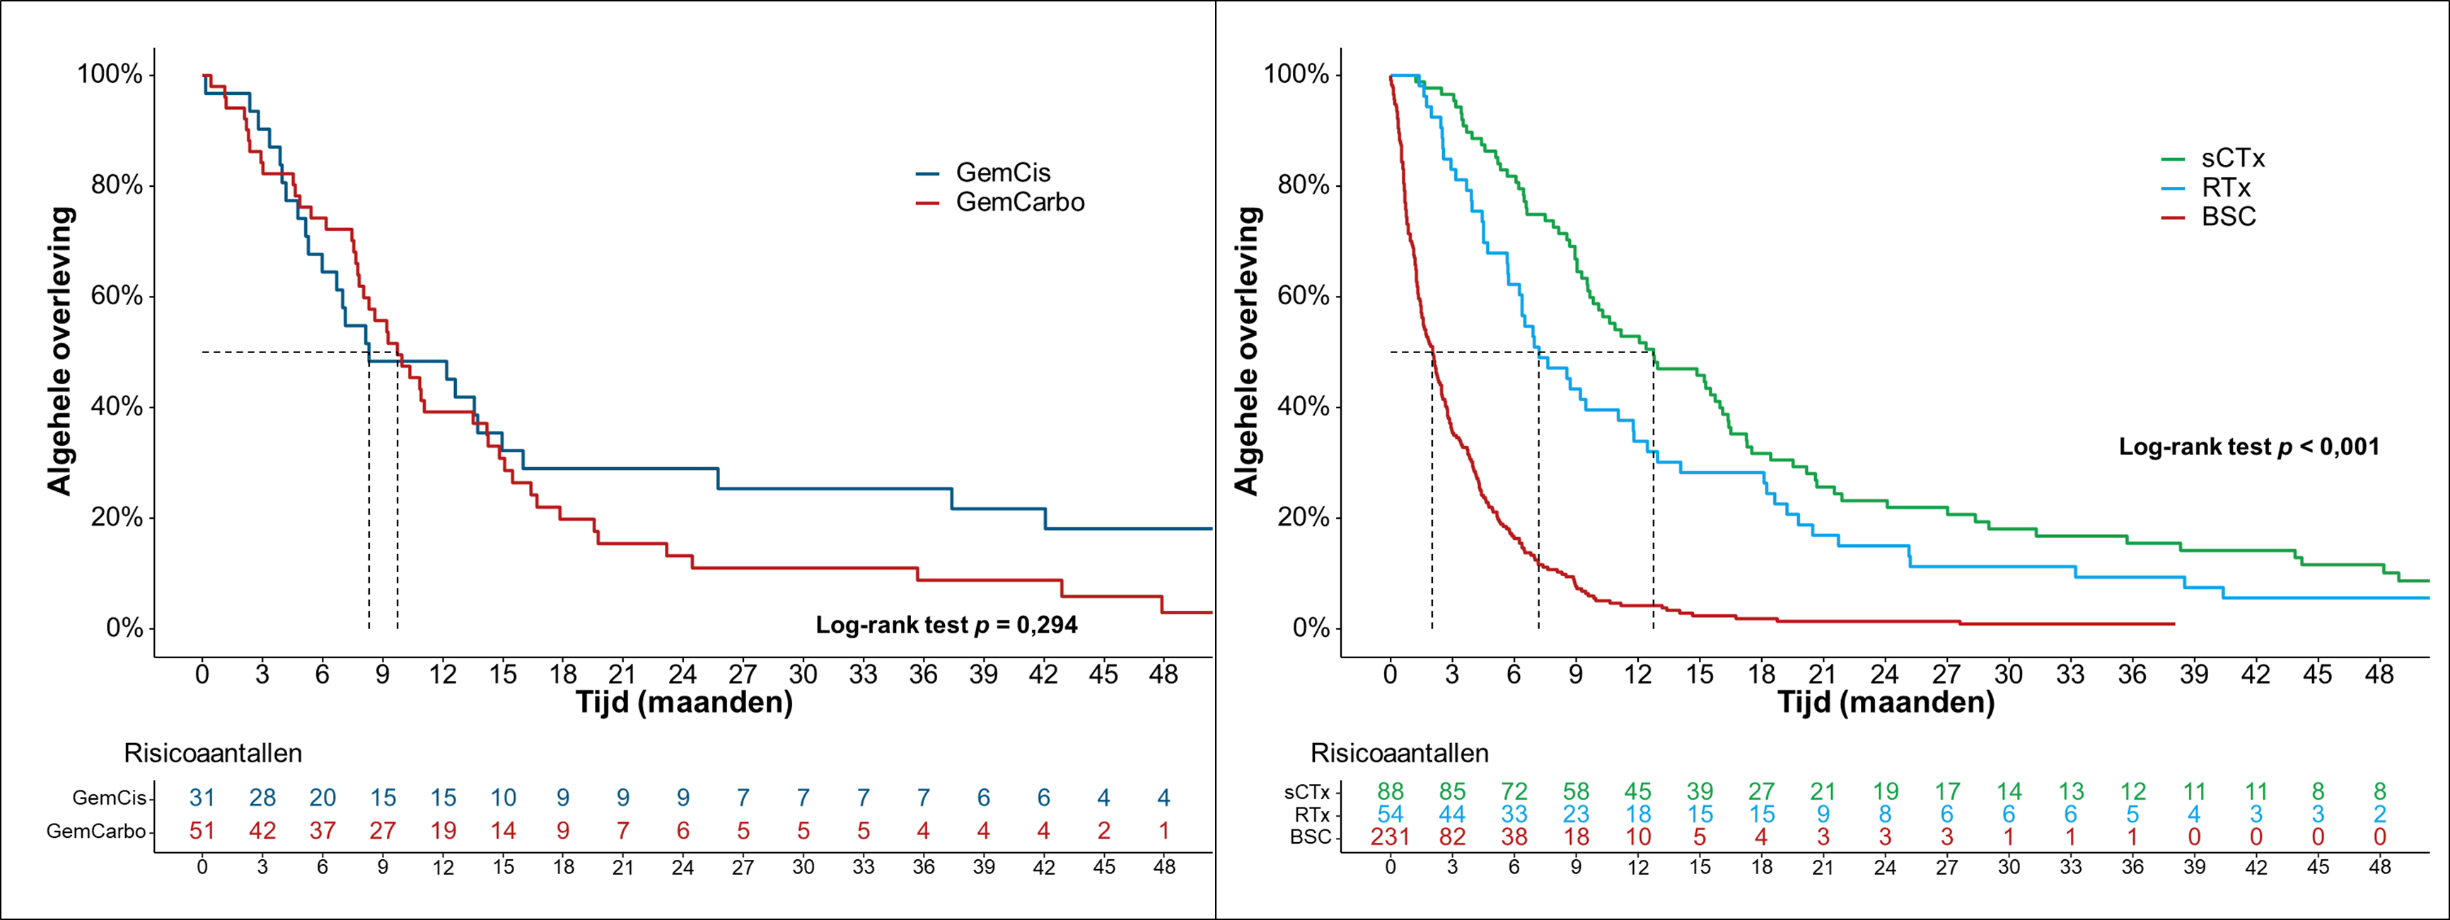

Supplement: MOESM3 [file 26837964]

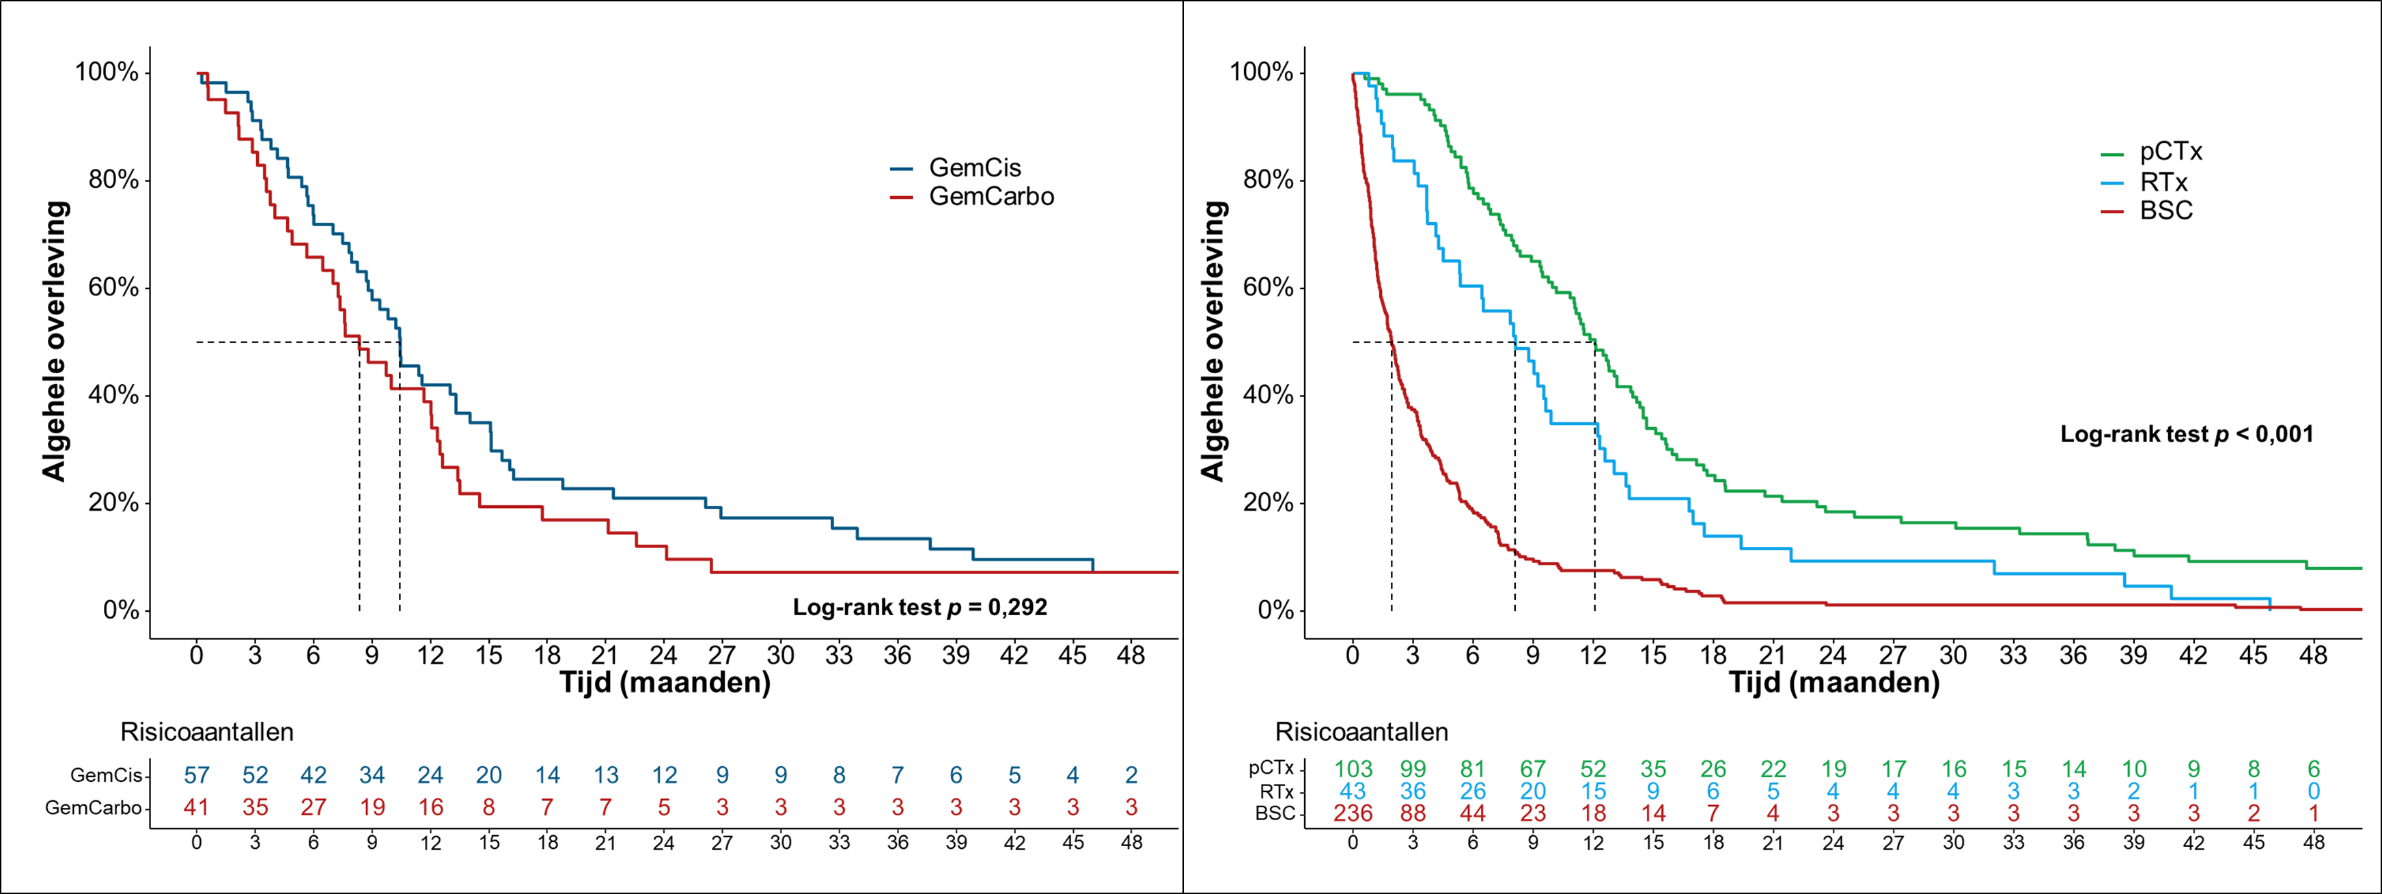

Supplement: MOESM4 [file 26837964]
